# Supplementary material for: First small-molecule PROTACs for G protein-coupled receptors: inducing α1A-adrenergic receptor degradation
Source: PubMed Central journal article supplement — Acta Pharm Sin B. 2020 Jan 27;10(9):1669–79. doi: 10.1016/j.apsb.2020.01.014 (PMC7563999; doi:10.1016/j.apsb.2020.01.014), 2020-01-27
Supplement: mmc2.pdf [file mmc2.pdf]

## Supporting Information for

### Original Article

#### First small-molecule PROTACs for G protein-coupled receptors: inducing $\alpha_{1A}$ -adrenergic receptor degradation

Zhenzhen Li<sup>a</sup>, Yuxing Lin<sup>a</sup>, Hui Song<sup>b</sup>, Xiaojun Qin<sup>a</sup>, Zhongxia Yu<sup>b</sup>, Zheng Zhang<sup>a</sup>, Gaopan Dong<sup>a</sup>, Xiang Li<sup>a</sup>, Xiaodong Shi<sup>c</sup>, Lupei Du<sup>a</sup>, Wei Zhao<sup>b</sup>, Minyong Li<sup>a,d,\*</sup>

<sup>a</sup>*Department of Medicinal Chemistry, Key Laboratory of Chemical Biology (MOE), School of Pharmacy, Shandong University, Jinan 250012, China*

<sup>b</sup>*Department of Immunology, Key Laboratory of Infection and Immunity of Shandong Province, School of Basic Medical Science, Shandong University, Jinan 250012, China*

<sup>c</sup>*Department of Chemistry, University of South Florida, Tampa, FL 33620, USA*

<sup>d</sup>*State Key Laboratory of Microbial Technology, Shandong University, Jinan 250100, China*

Received 19 September 2019; received in revised form 18 November 2019; accepted 26 December 2019

\*Corresponding author. Tel./fax: +86 531 88382076.

E-mail address: mli@sdu.edu.cn (Minyong Li).

#### Table of contents

|                                                                                                                  |     |
|------------------------------------------------------------------------------------------------------------------|-----|
| <b>Figure S1</b> The cytotoxicity of compounds .....                                                             | S2  |
| <b>Figure S2</b> The effects of compound <b>9c</b> on the level of $\alpha_{1B}$ -AR and $\alpha_{1D}$ -AR ..... | S2  |
| <b>Figure S3</b> Docking model of the compound <b>9c</b> bound to DDB1-CRBN .....                                | S3  |
| <b>Figure S4</b> Photograph of nude mice. ....                                                                   | S3  |
| NMR, MS and HRMS data of compounds .....                                                                         | S4  |
| HPLC data of final compounds.....                                                                                | S17 |

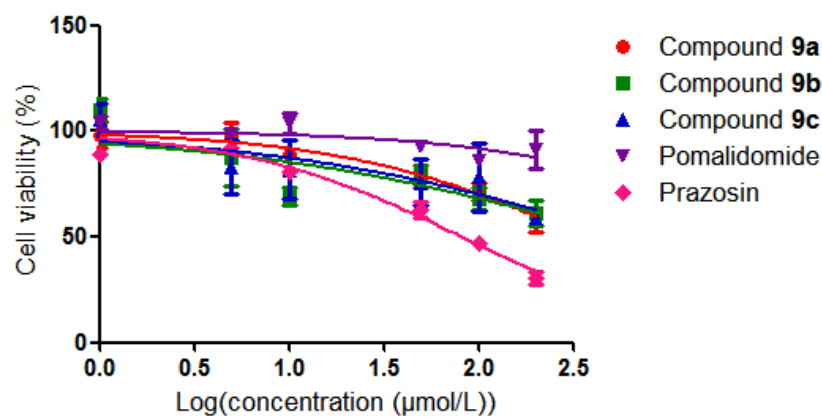

**Figure S1** The cytotoxicity of compounds, 0–200 μmol/L.

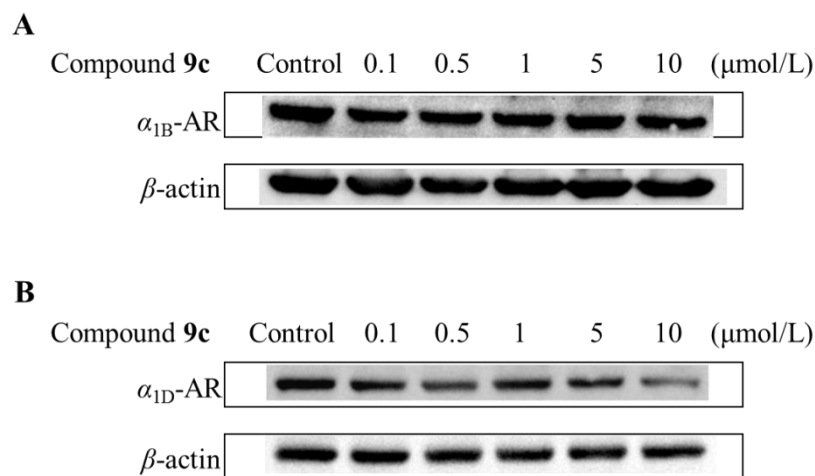

**Figure S2** The effects of compound 9c on the level of  $\alpha_{1B}$ -AR and  $\alpha_{1D}$ -AR. The cells were treated with compound 9c as indicated for 12 h before harvesting and then analyzed by Western blotting.

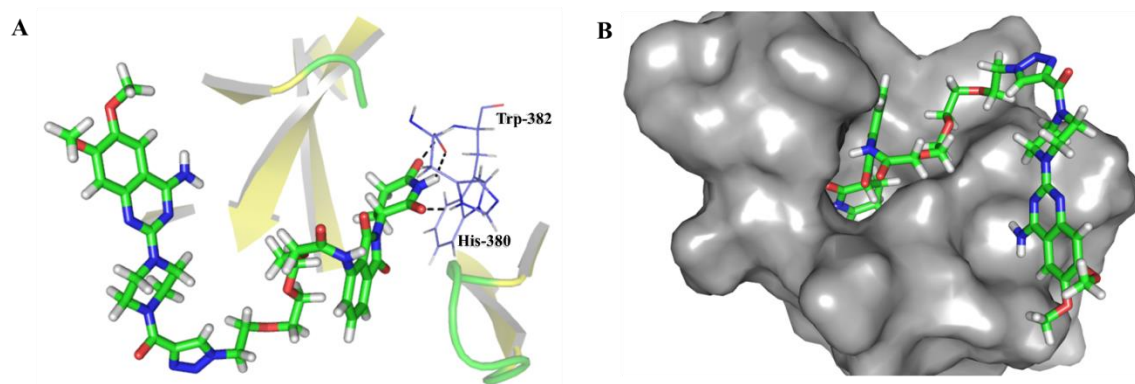

**Figure S3** (A) Binding sites of the hydrogen bonds between compound **9c** and CRBN. Compound **9c** is highlighted in the green stick. The dimer forming the cap for the binding pocket is colored in light yellow. Black dash lines represent the key hydrogen bonds. (B) Docking model of the compound **9c** bound to DDB1-CRBN (PDB: 4CI3).

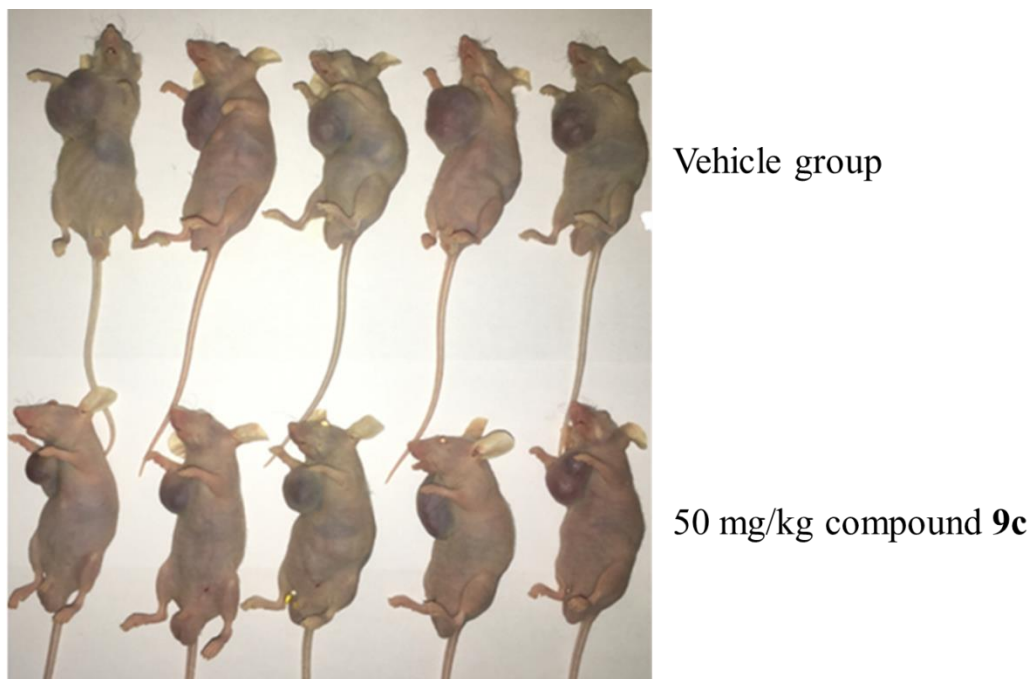

**Figure S4** The nude mice with the PC-3 derived prostate cancer xenografts were photographed after two weeks of intraperitoneal administration.

## NMR, MS and HRMS data of compounds

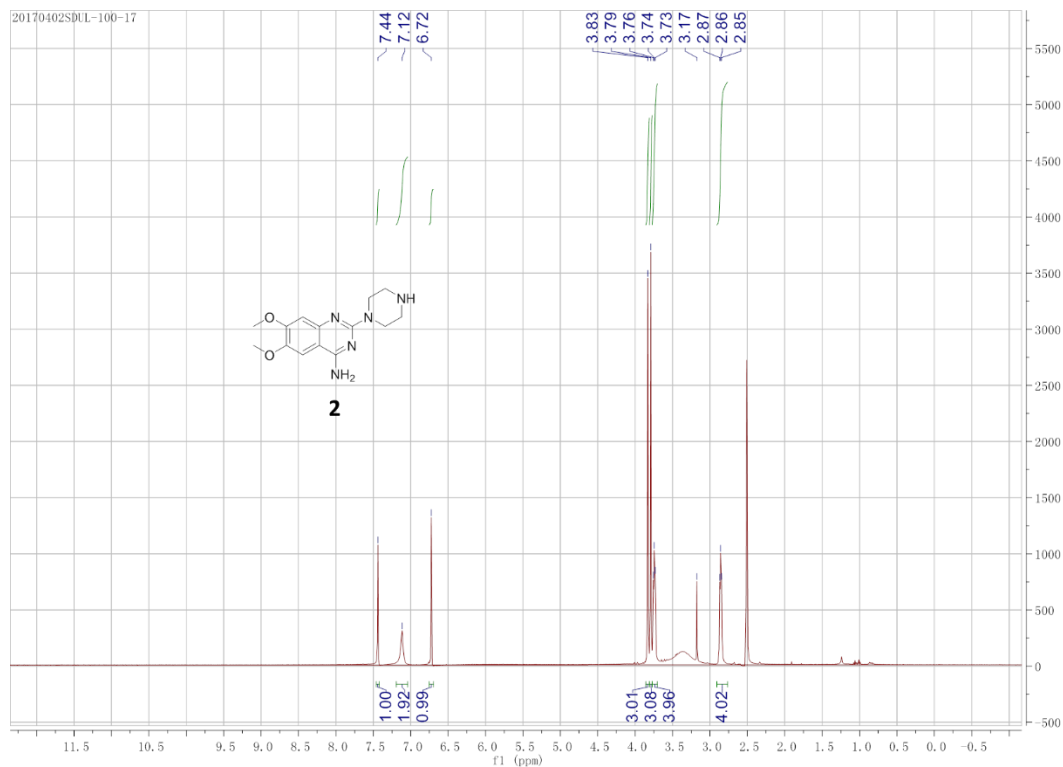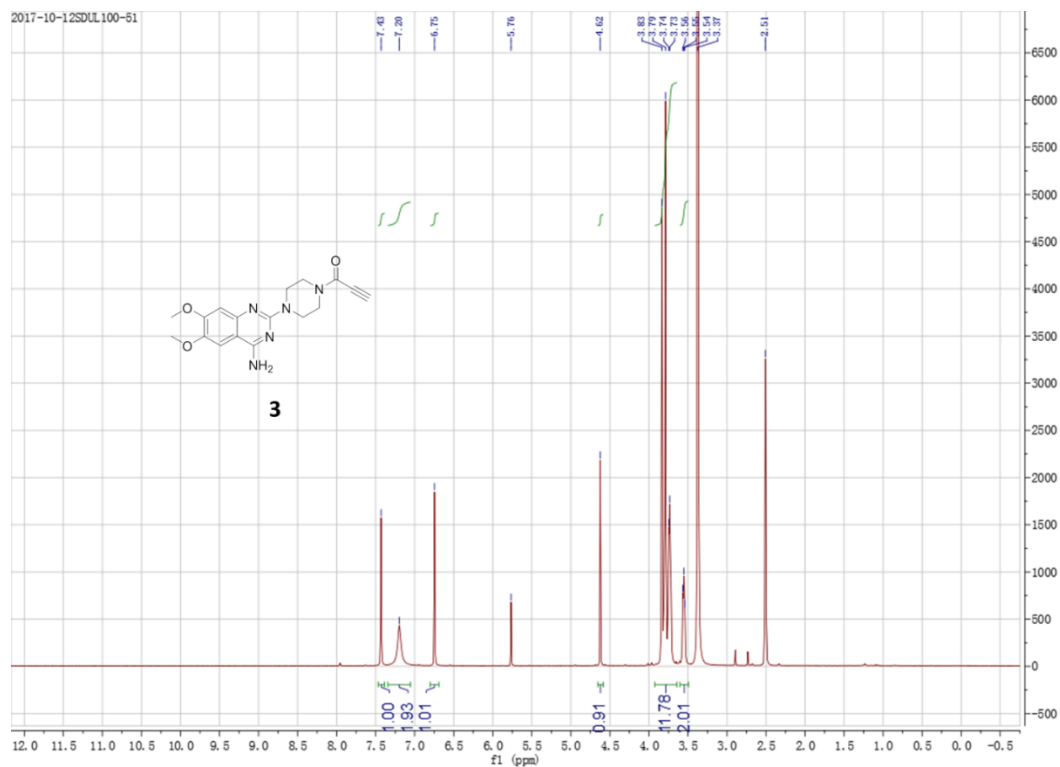

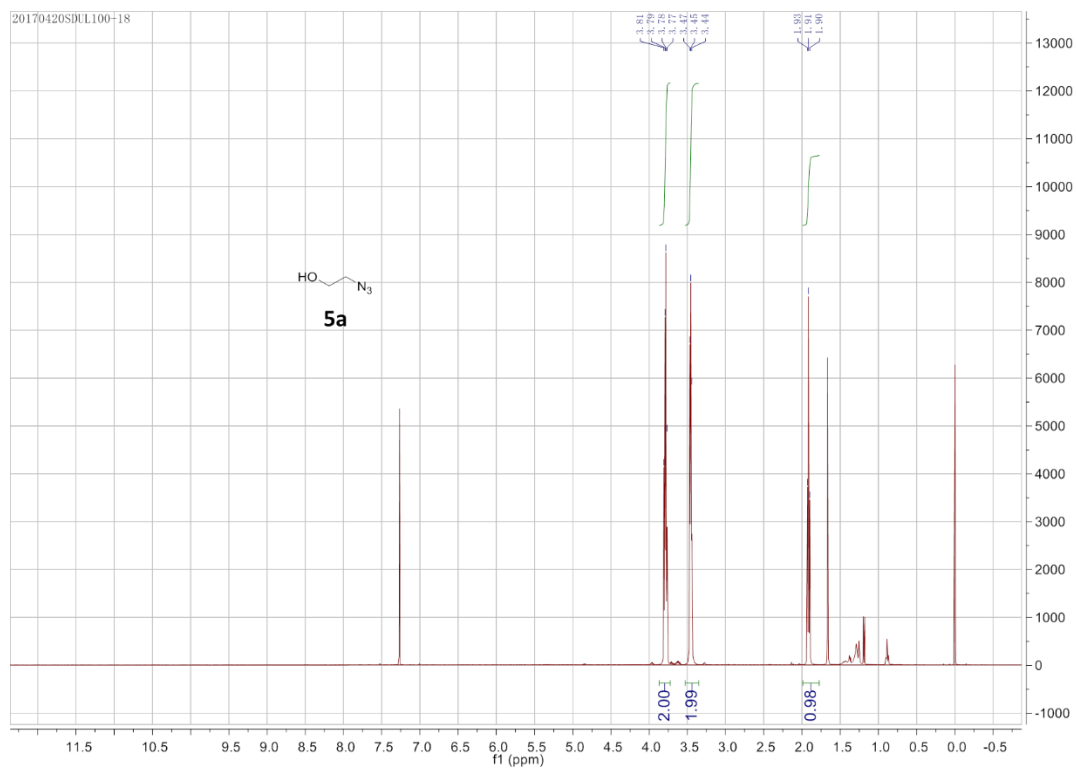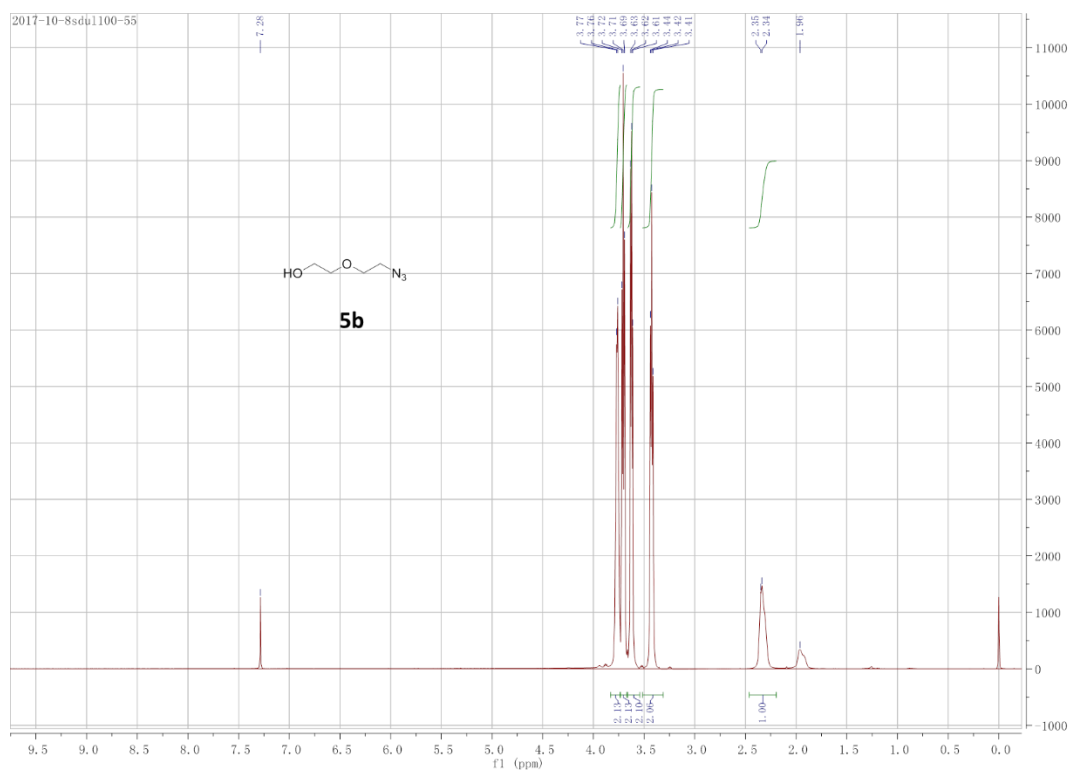

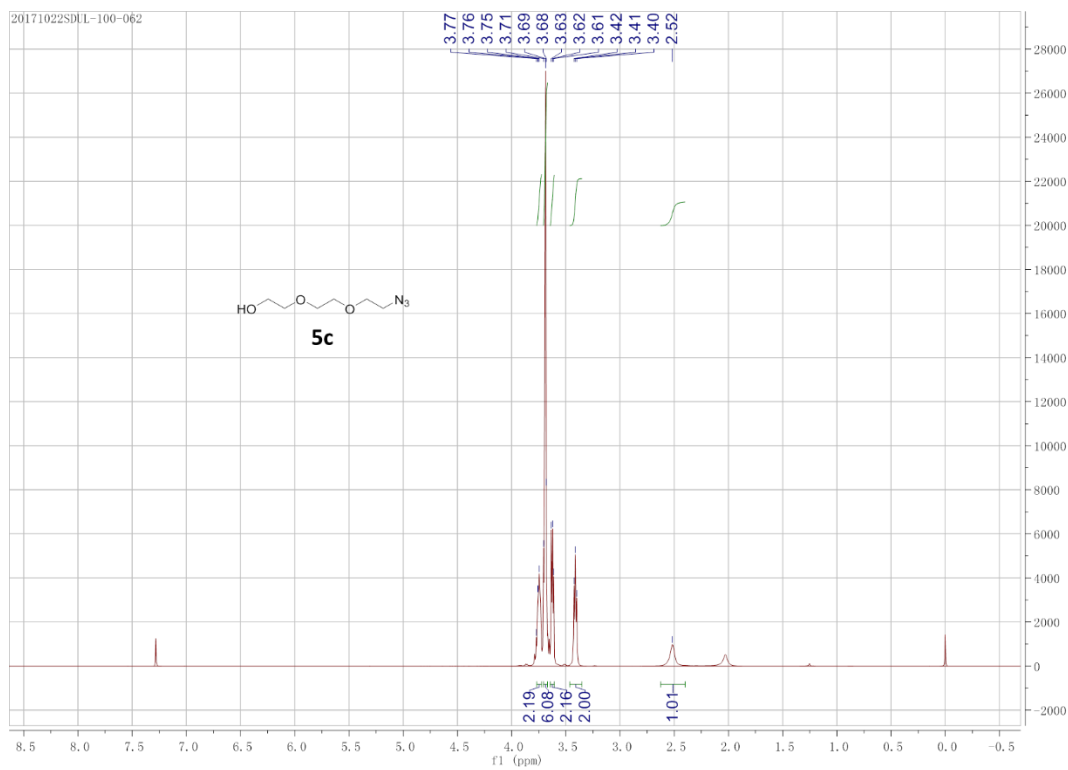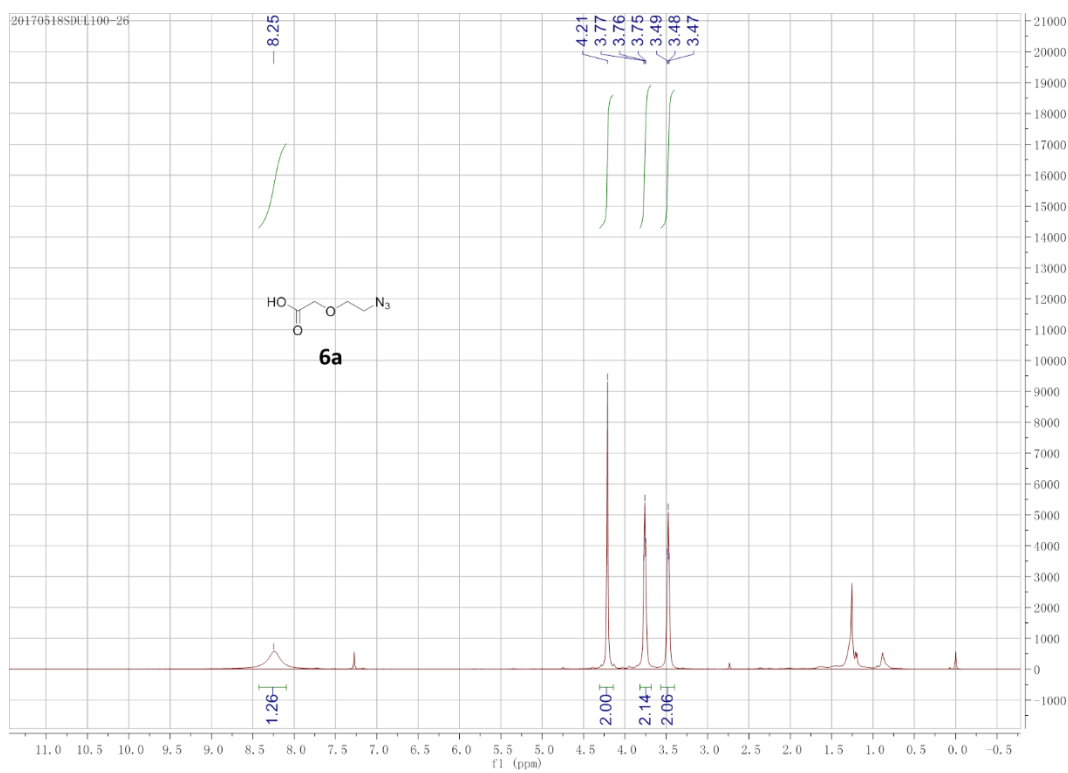

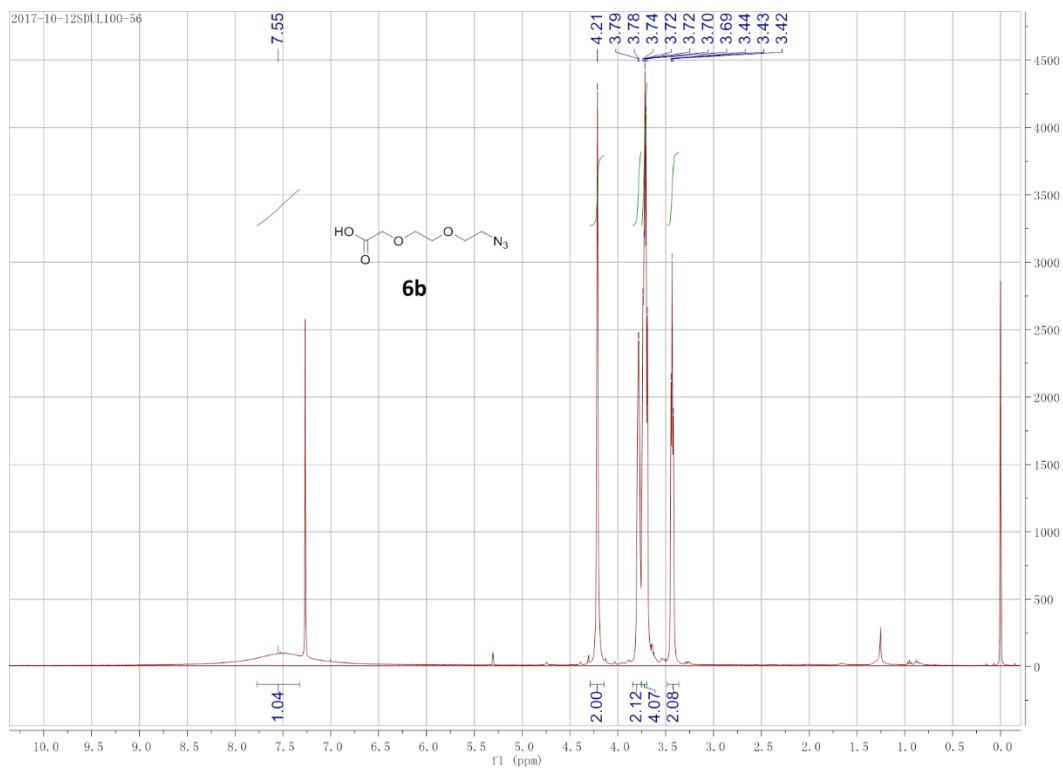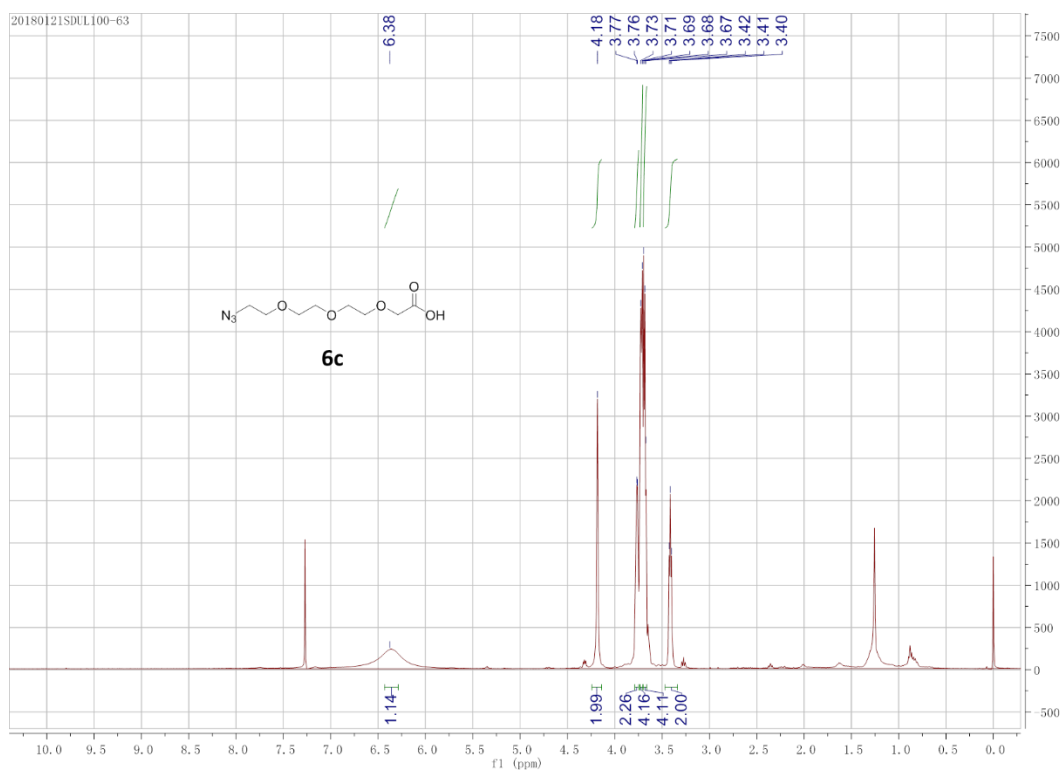

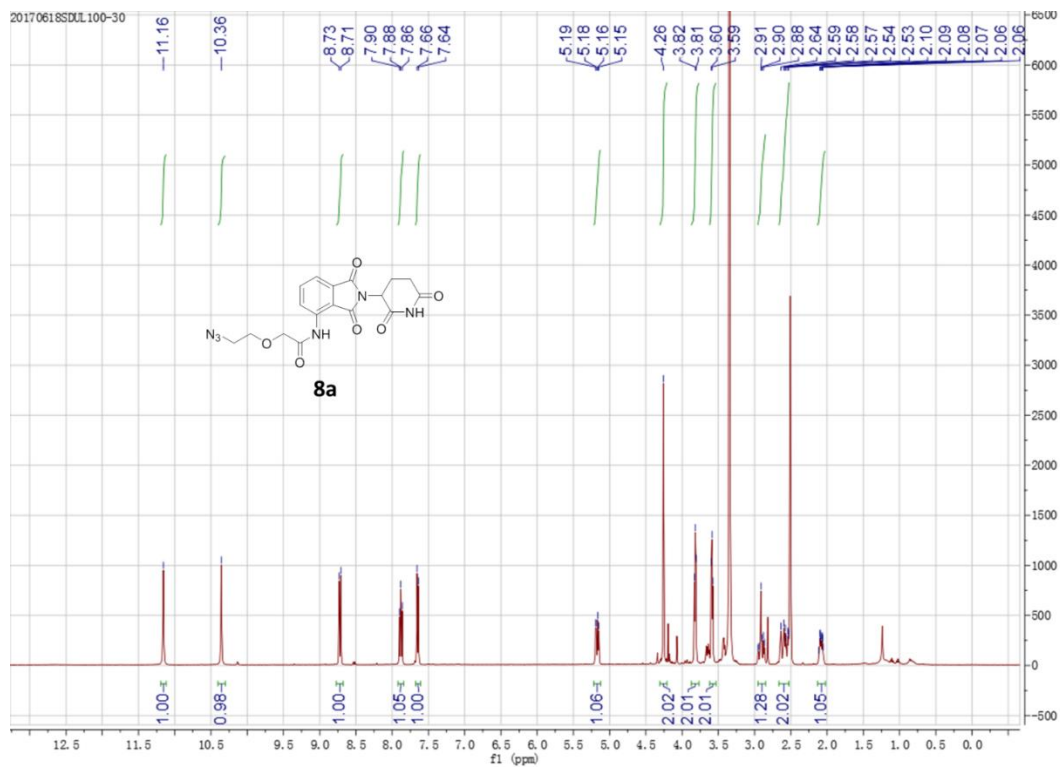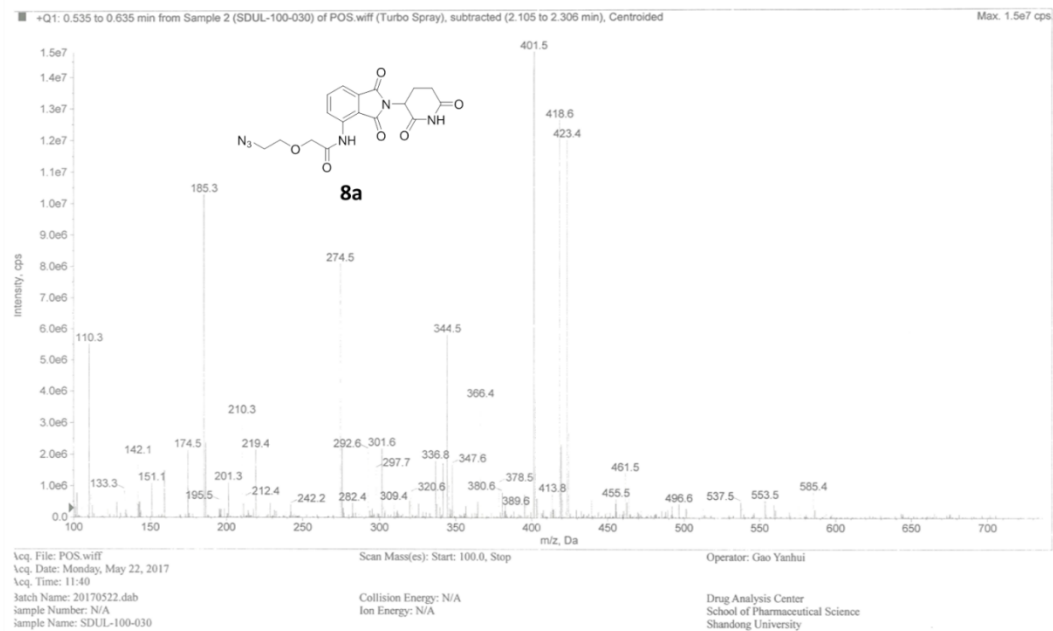

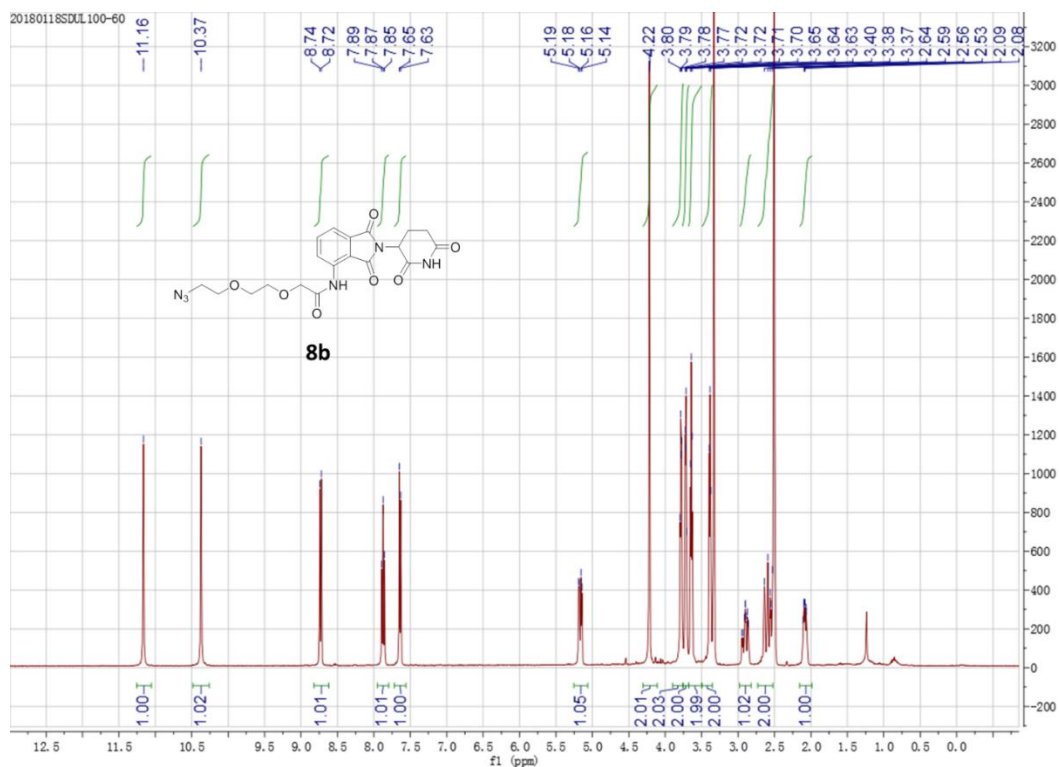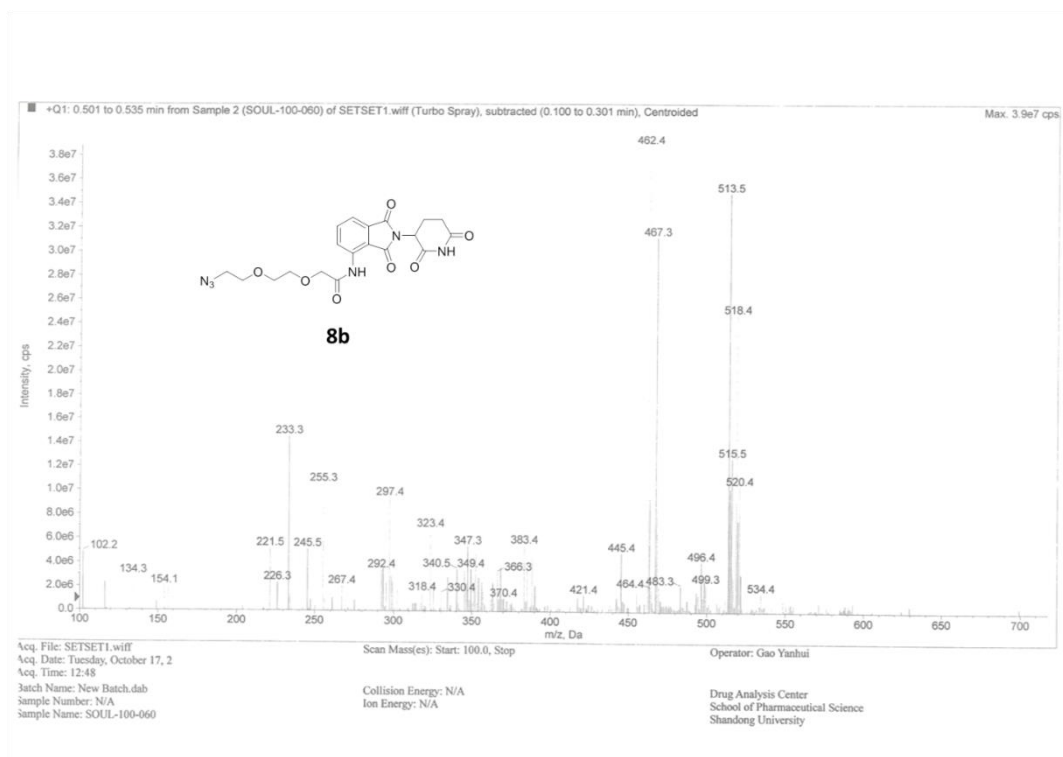

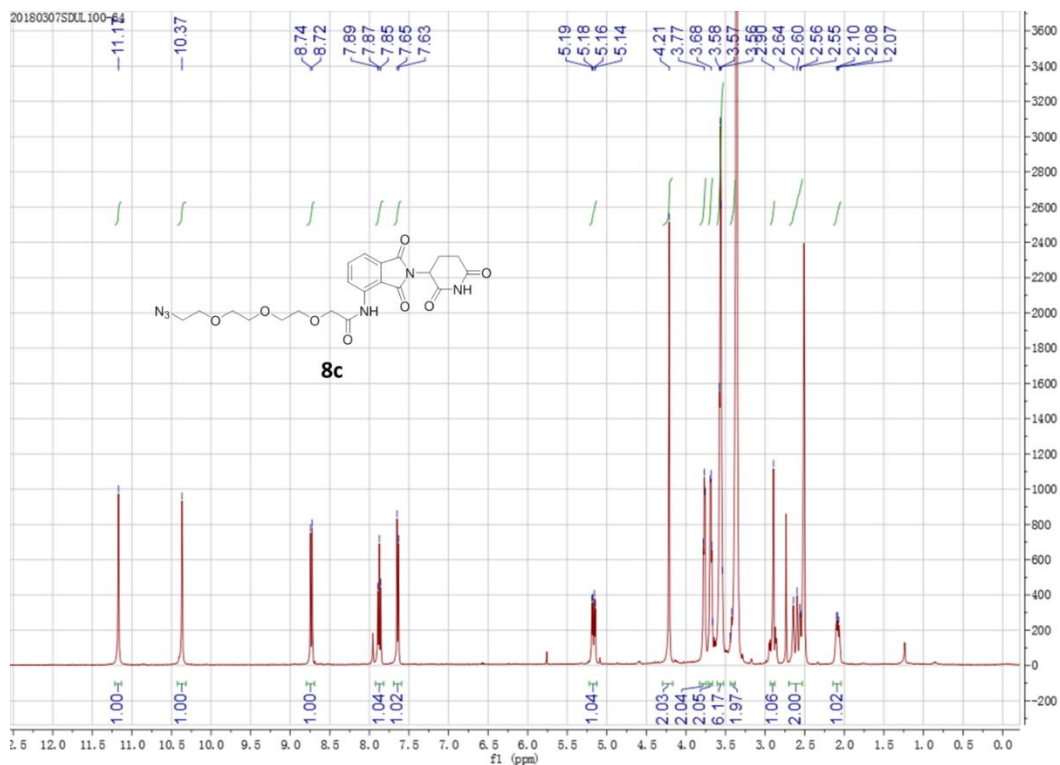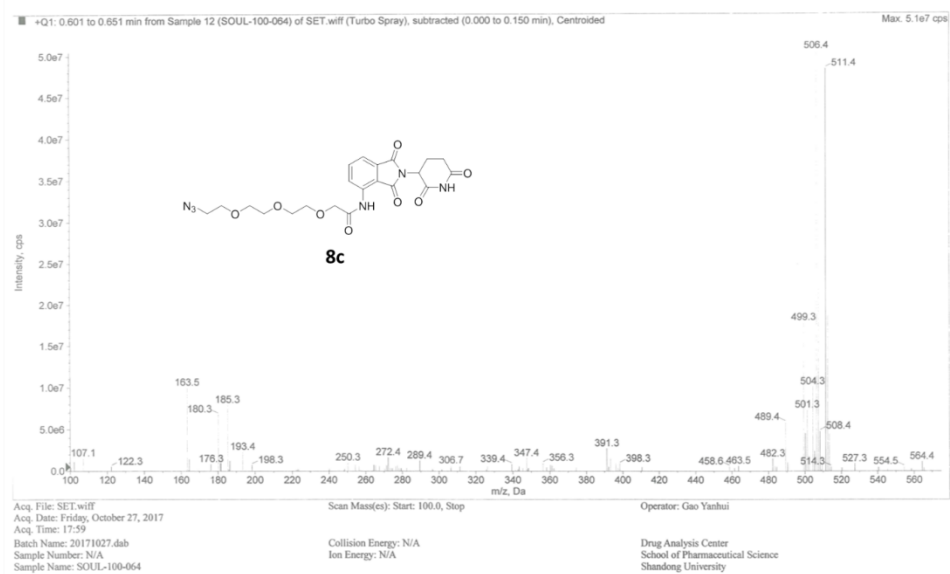

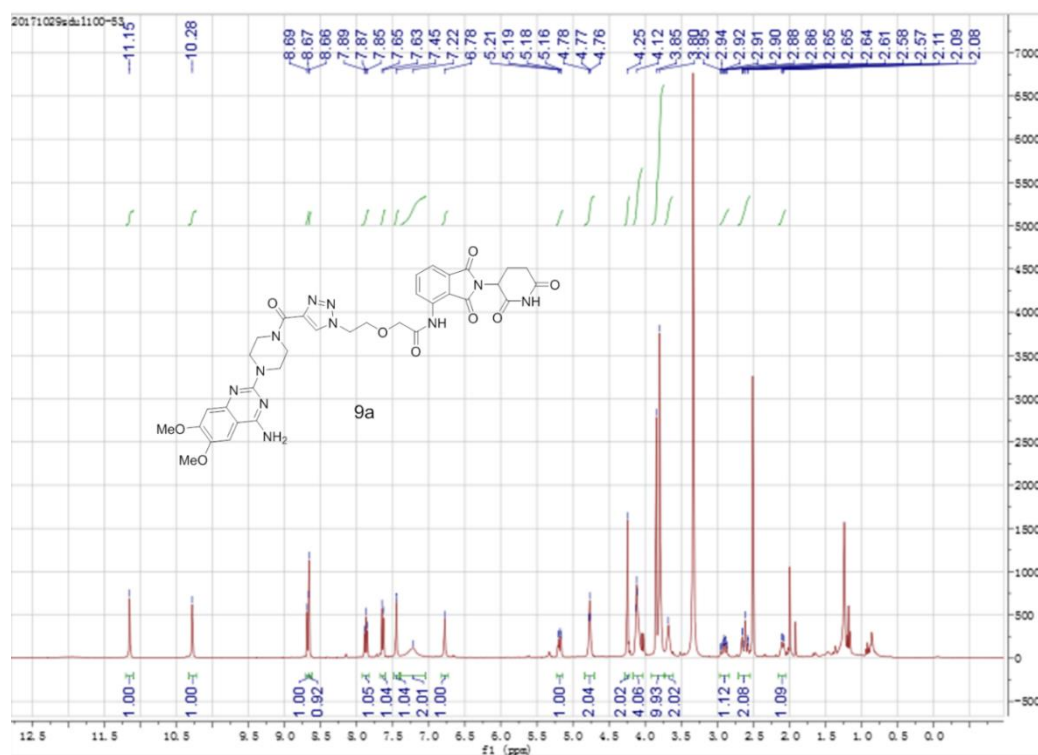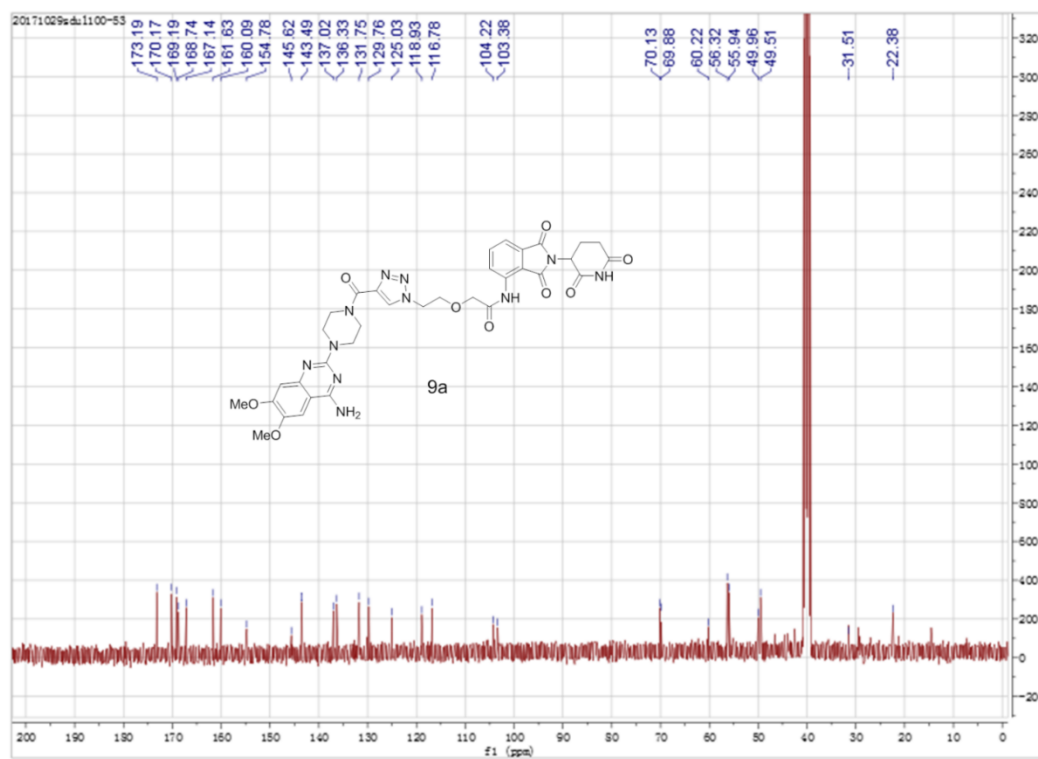

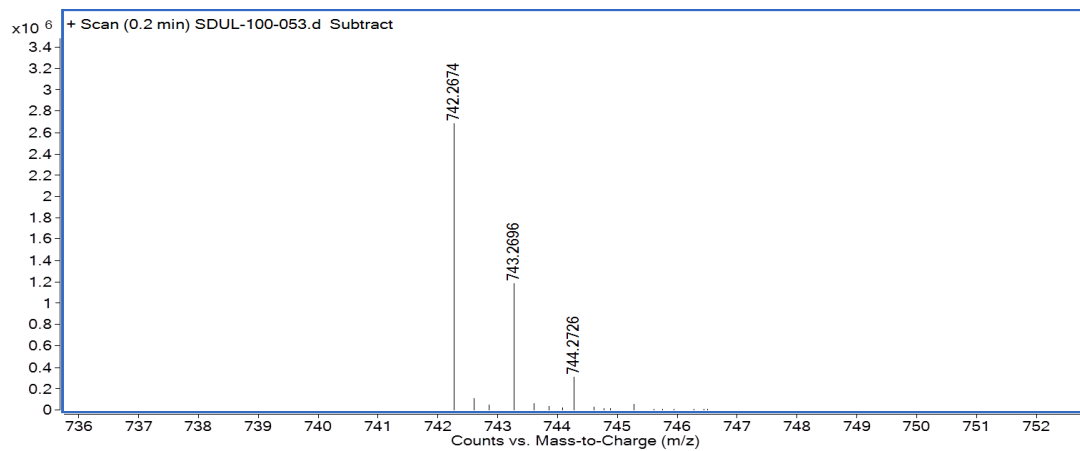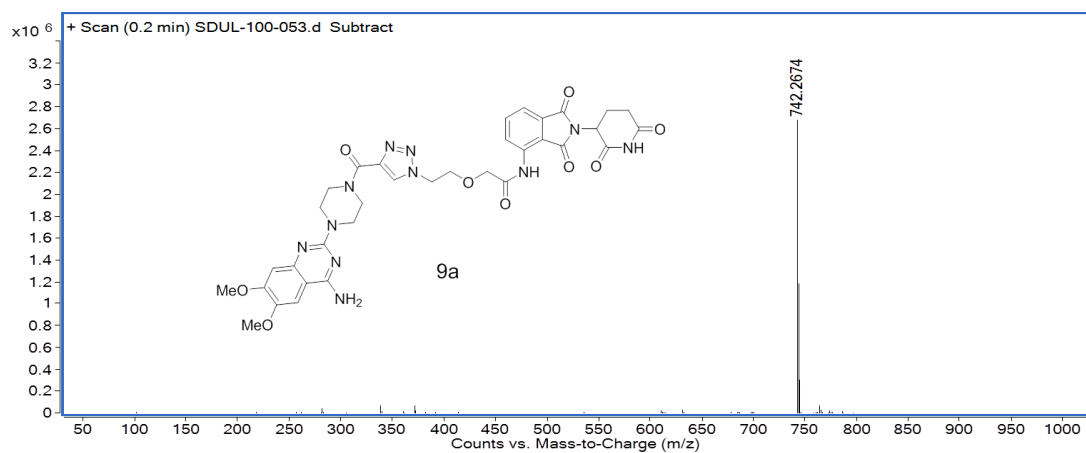

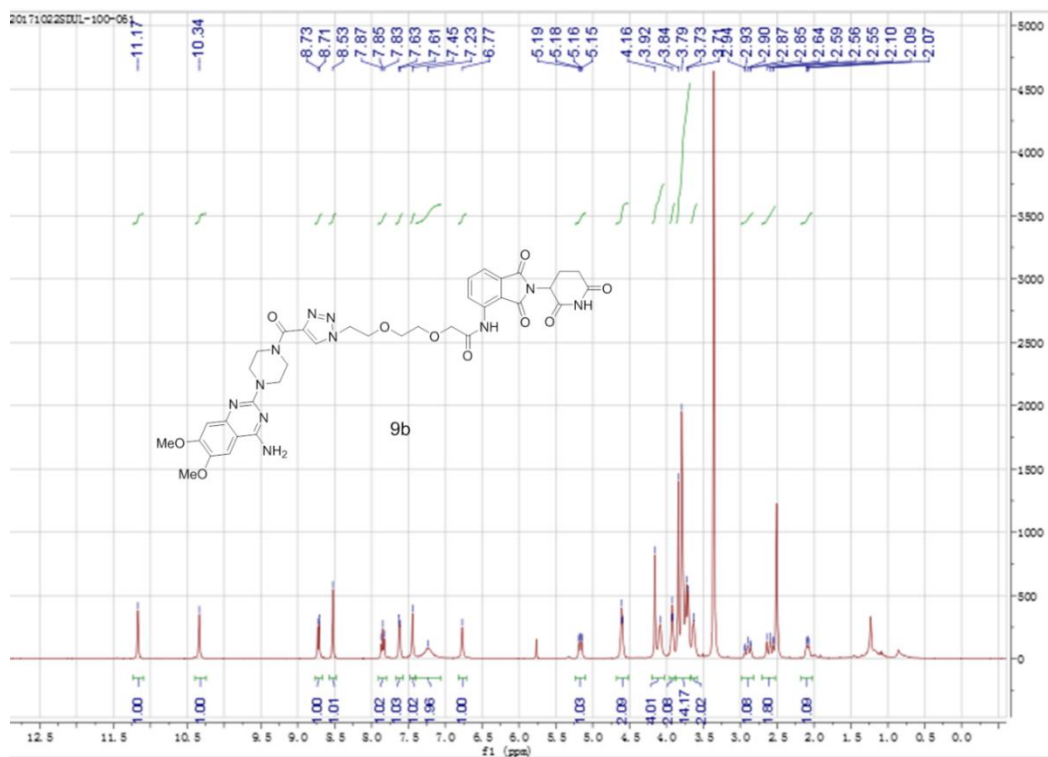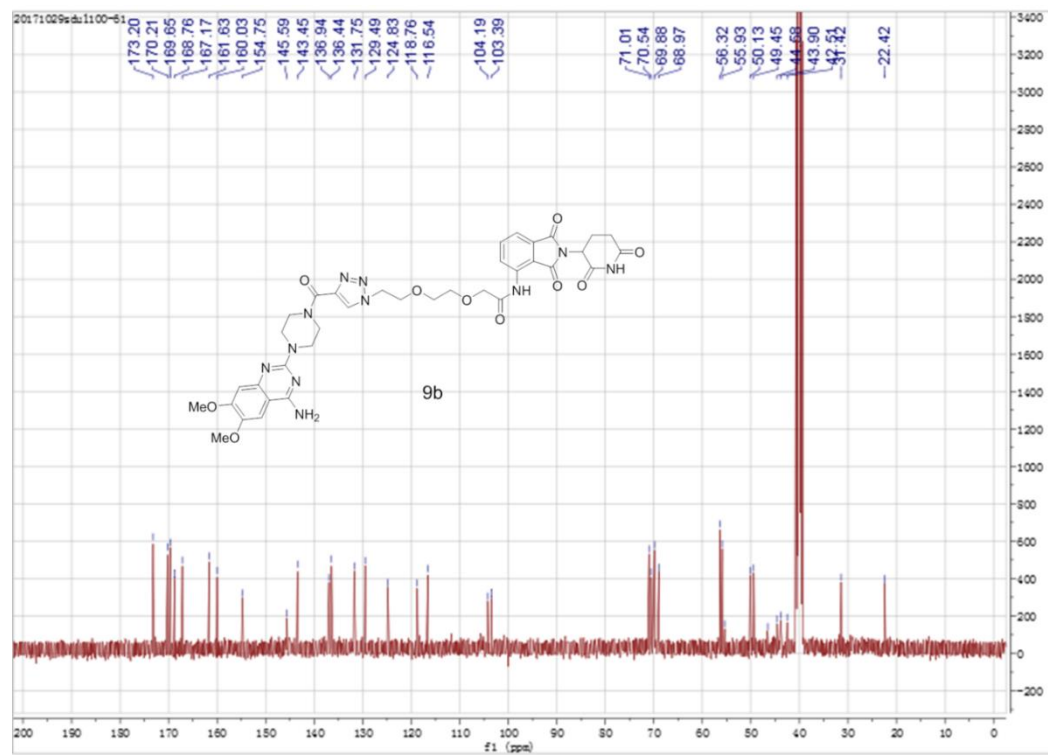

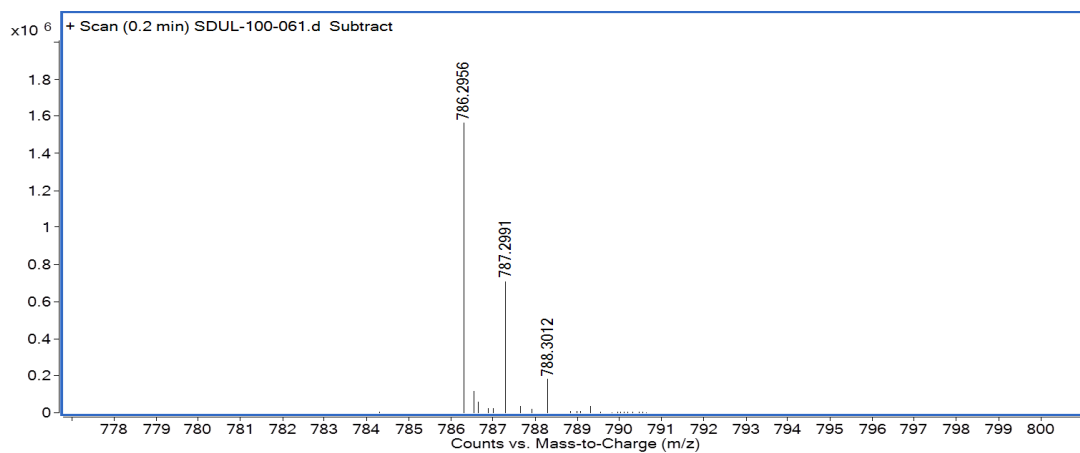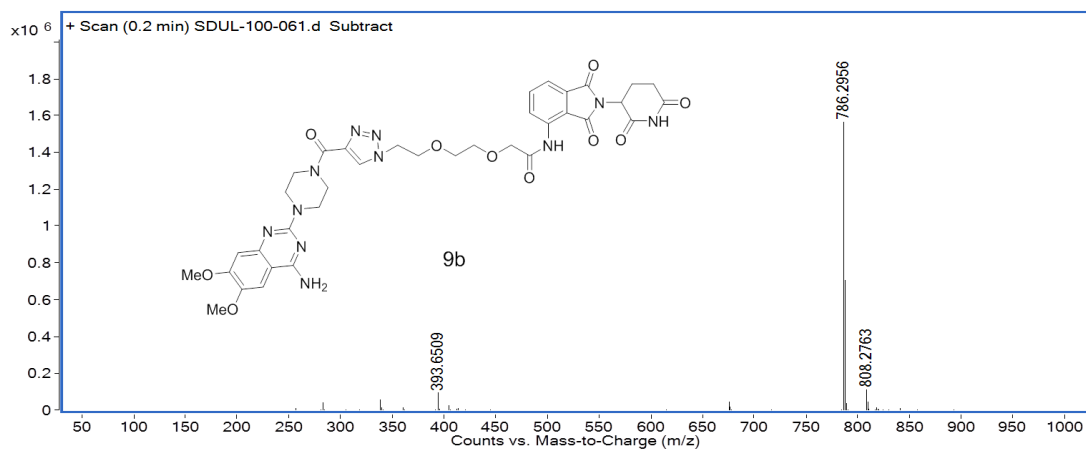

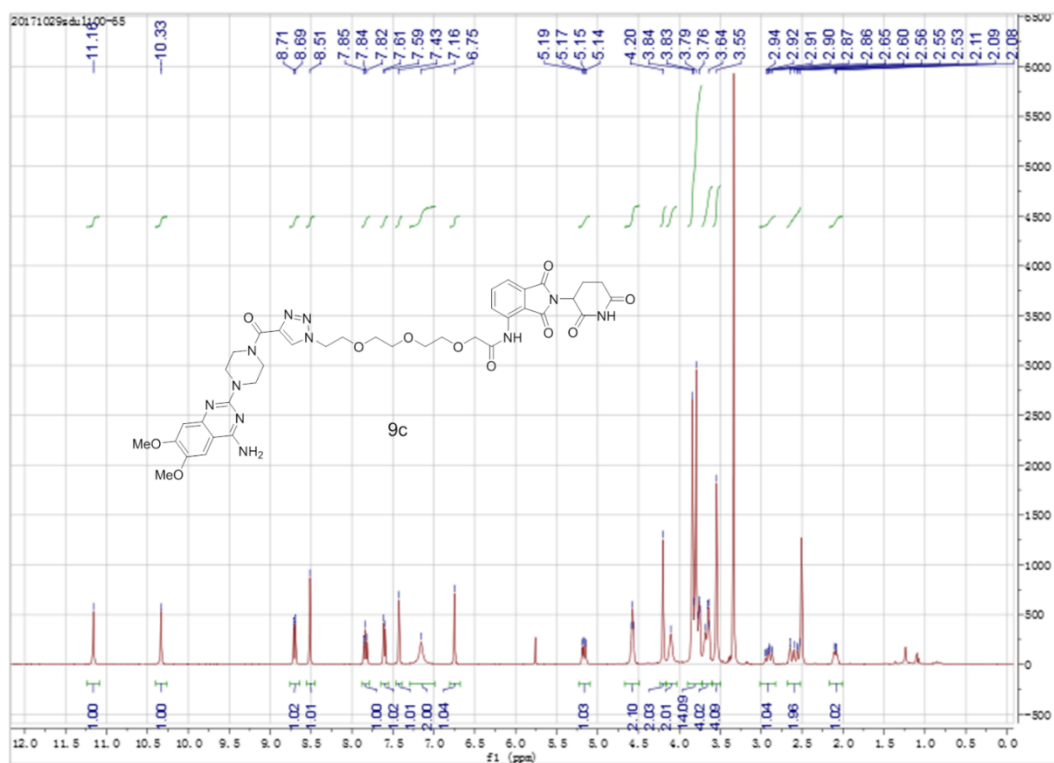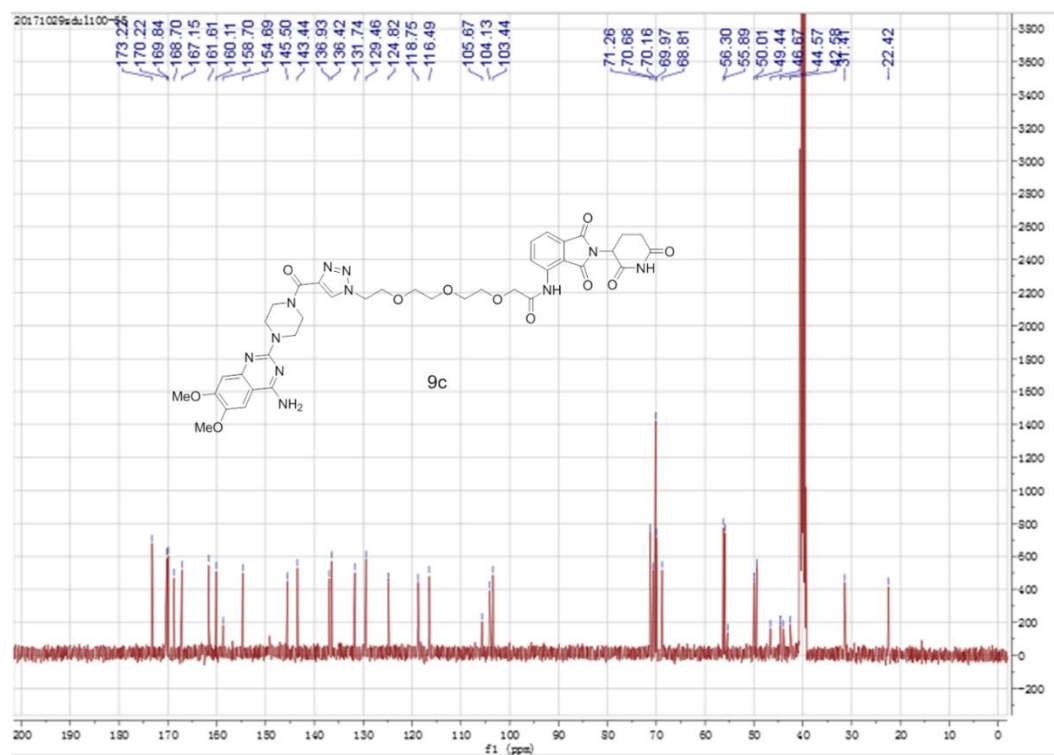

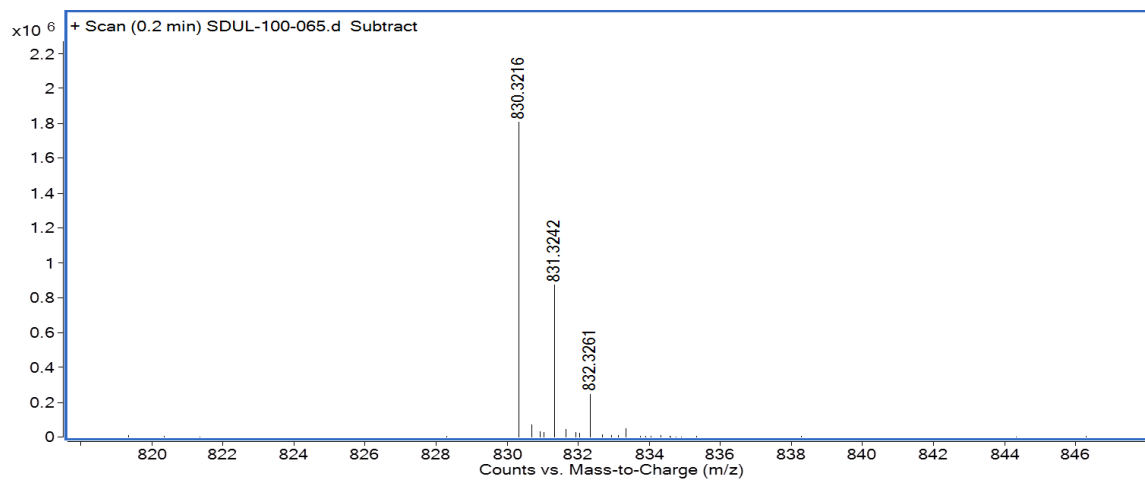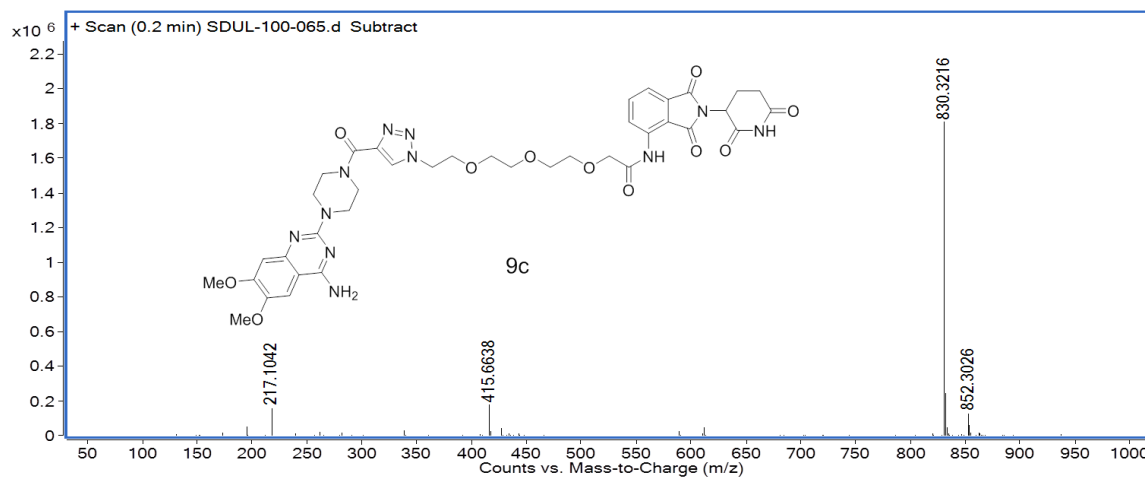

## HPLC data of final compounds

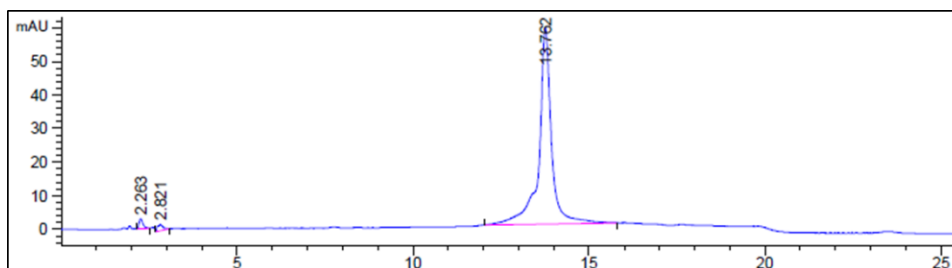

| Peak | Retention time (min) | Peak types | Peak width | Peak area  | Peak height | Peak area (%) |
|------|----------------------|------------|------------|------------|-------------|---------------|
| 1    | 2.263                | BB         | 0.1160     | 22.53704   | 2.98896     | 1.4953        |
| 2    | 2.821                | BB         | 0.1452     | 19.77697   | 1.78535     | 1.3122        |
| 3    | 13.762               | BB         | 0.3518     | 1464.83813 | 58.56503    | 97.1925       |

### HPLC analysis of compound 9a.

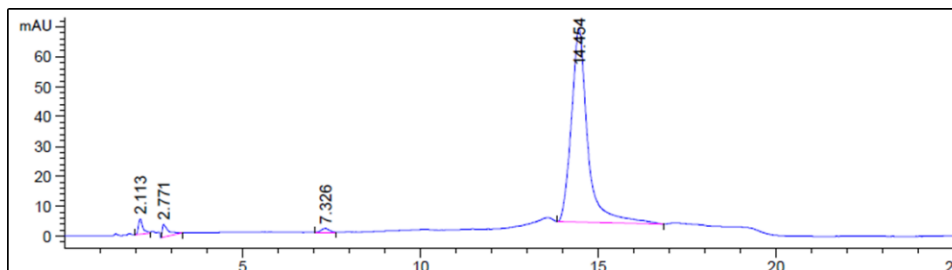

| Peak | Retention time (min) | Peak types | Peak width | Peak area  | Peak height | Peak area (%) |
|------|----------------------|------------|------------|------------|-------------|---------------|
| 1    | 2.113                | BV         | 0.1349     | 46.53817   | 5.17572     | 2.1330        |
| 2    | 2.771                | BB         | 0.1574     | 50.87490   | 4.25820     | 1.3317        |
| 3    | 7.326                | BB         | 0.2046     | 19.47536   | 1.23116     | 0.8926        |
| 4    | 14.454               | BB         | 0.4568     | 2064.94604 | 64.96188    | 95.6427       |

### HPLC analysis of compound 9b.

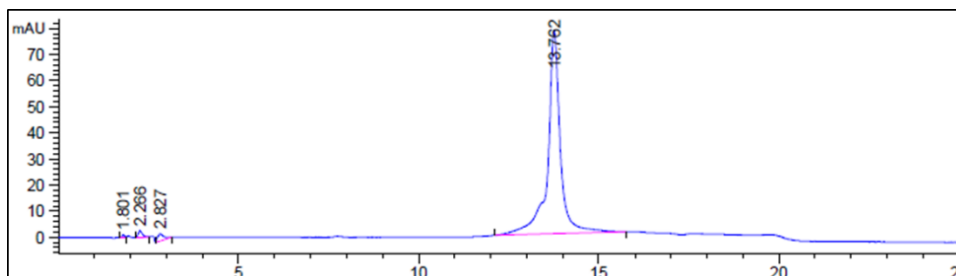

| Peak | Retention time (min) | Peak types | Peak width | Peak area  | Peak height | Peak area (%) |
|------|----------------------|------------|------------|------------|-------------|---------------|
| 1    | 1.801                | BV         | 0.0785     | 6.08178    | 1.17374     | 0.3082        |
| 2    | 2.266                | BB         | 0.1211     | 19.89354   | 2.49283     | 1.0083        |
| 3    | 2.827                | BB         | 0.1618     | 33.25452   | 2.77606     | 1.6854        |
| 4    | 13.762               | BB         | 0.3467     | 1913.82581 | 77.88319    | 96.9981       |

### HPLC analysis of compound 9c.
